# Supplementary material
Source: Springer Nature journal article supplement (https://www.springermedizin.de/resource/supplementary/12936_2010_1380_MOESM1_ESM.pdf/9549658)
Supplement: MOESM1 [file 9549658]

# « SMS for Life » : un projet pilote destiné à améliorer la gestion de la fourniture d'antipaludiques dans les zones rurales de Tanzanie à l'aide d'une technologie standard

Jim Barrington<sup>1\*</sup>, Olympia Wereko-Brobby<sup>2</sup>, Peter Ward<sup>3</sup>, Winfred Mwafongo<sup>4</sup>, Seif Kungulwe<sup>5</sup>

## A propos de cette traduction

Cette traduction a été réalisée en 2010 par BioMed Central en association avec RWS Group à partir de la parution d'origine en anglais : Barrington *et al.*: *SMS for Life: a pilot project to improve anti-malarial drug supply management in rural Tanzania using standard technology*. *Malaria Journal* 2010 9:298. <http://www.malariajournal.com/content/1/9/298>

## Résumé

**Contexte :** le maintien des fournitures adéquates d'antipaludiques aux établissements de santé en Afrique subsaharienne rurale est un obstacle majeur à la gestion efficace de la maladie. Le manque de visibilité des niveaux de stock d'antipaludiques au niveau des établissements de santé contribue de manière significative à ce problème.

**Méthodes :** une étude pilote d'une durée de 21 semaines, baptisée « SMS for Life », a été menée en 2009-2010 dans trois districts ruraux de Tanzanie, impliquant 129 établissements de santé. Menée grâce à un partenariat de collaboration composé d'établissements publics et privés, l'étude « SMS for Life » a fait appel à des téléphones portables, des SMS et à une technologie de cartographie électronique pour faciliter la fourniture d'inventaires complets et précis de tous les établissements de santé pour chaque équipe de direction du district, sur une base hebdomadaire. Le système a couvert les stocks de quatre posologies différentes d'artéméther-luméfantrine (AL) et de quinine injectable.

**Résultats :** les données relatives aux inventaires ont été fournies dans 95 % des cas, en moyenne. Un taux de réponse élevé ( $\geq 93$  %) a été maintenu tout au long de l'étude pilote. Le taux d'erreur de la rédaction des réponses SMS est élevé en moyenne à 7,5 % tout au long de l'étude ; la quasi-totalité des erreurs ont été corrigées et les messages renvoyés. L'exactitude des données, sur la base de visites de surveillance effectuées dans les établissements de santé, était de 94 %. Les rapports d'inventaire des districts ont été consultés, en moyenne, une fois par jour. La proportion d'établissements de santé ne possédant aucun stock pour un ou plusieurs antipaludiques (c'est-à-dire l'une des quatre posologies d'AL ou de quinine injectable) est passée de 78 % la 1<sup>ère</sup> semaine à 26 % la 21<sup>ème</sup> semaine. Dans le district de Lindi Rural, les ruptures de stock ont été supprimées avant la 8<sup>ème</sup> semaine. Pratiquement aucune rupture de stock n'a été constatée par la suite. Au cours de l'étude, les stocks d'AL ont augmenté de 64 % et le stock de quinine de 36 %, dans les trois districts.

**Conclusions :** l'étude pilote « SMS for Life » a permis d'offrir une visibilité sur les niveaux de stock d'antipaludiques afin de soutenir une gestion plus efficace des stocks à l'aide d'une technologie SMS simple et largement répandue, par l'intermédiaire d'un modèle de partenariat public-privé qui a extrêmement bien fonctionné. Le système « SMS for Life » a le potentiel d'améliorer la disponibilité limitée des antipaludiques ou d'autres médicaments dans les milieux ruraux ou qui ne disposent pas de ressources suffisantes.

\*Correspondance : jim.barrington@novartis.com

<sup>1</sup>Directeur du programme « SMS for Life », Forum 1.P-94, Novartis Campus, CH-4056 Bâle, Suisse.

La liste complète des coordonnées des auteurs est disponible à la fin de l'article.

## Contexte

La combinaison thérapeutique à base d'artémisinine (ACT) est recommandée par l'OMS pour le traitement de première intention du paludisme à *Plasmodium falciparum* non

compliqué [1]. L'organisation est consciente la supériorité de l'efficacité et de l'amélioration plus rapide des symptômes observés avec la ACT par rapport à d'autres traitements [2,3], et de la réduction des gamétocytes chez les patients bénéficiant d'une ACT pouvant ainsi potentiellement contribuer à la diminution du taux de transmission de la maladie [1,4,5].

Le maintien de la fourniture adéquate de ACT aux établissements de santé situés dans les zones rurales d'Afrique subsaharienne peut cependant se révéler très difficile. La mauvaise gestion de la chaîne d'approvisionnement, ie un contrôle et des prévisions de stock limités voire inexistantes, entraînent fréquemment des ruptures de stocks au niveau local -même si les antipaludiques sont disponibles au niveau national-qui peuvent se poursuivre pendant des périodes prolongées. Par conséquent, des patients ont du parcourir de longues distances pour obtenir une ACT ou, bien trop souvent, ces patients ne sont pas traités avec les risques de complication de la maladie, de lésions organiques et de décès.

La Tanzanie abrite la troisième population la plus exposée au paludisme, 11 millions de cas survenant chaque année [6]. Dans le pays, la ACT constitue un traitement de première intention, bien que l'on ait recours aux tests de diagnostic rapides (TDR) uniquement pour confirmer le diagnostic lorsque les établissements de santé disposent de cette ressource ; dans le cas contraire, le diagnostic est réalisé sur la base des symptômes cliniques. En Tanzanie, les traitements antipaludiques peuvent être distribués de deux manières différentes. Les médicaments peuvent être fournis automatiquement aux établissements de santé en quantités fixes chaque trimestre, les exigences étant déterminées au niveau du district par le Médecin-chef de district (MCD) et au niveau national par le Programme national de lutte contre le paludisme (PNLP) (le système « à flux poussé »). Les médicaments peuvent également être distribués chaque mois pour répondre aux demandes individuelles des établissements de santé envoyées par le MCD et soumis à l'approbation du Ministère de la Santé, après quoi les médicaments sont expédiés via un Système logistique intégré (SLI) (le système « à flux tiré »). Dans les deux cas, les médicaments sont stockés et expédiés depuis l'un des neufs entrepôts régionaux du pays.

Sachant que la technologie commune disponible a le potentiel d'améliorer la gestion des approvisionnements en antipaludiques dans les régions rurales, un partenariat de collaboration composé d'établissements publics et privés a été établi sous les auspices du partenariat « Roll Back Malaria/Faire reculer le paludisme » afin d'entreprendre un projet pilote de 21 semaines en Tanzanie. L'objectif du projet consistait à améliorer l'approvisionnement, la planification et l'accès à la ACT grâce à l'utilisation de téléphones portables, de SMS et d'une technologie de cartographie électronique. Les résultats

de ce projet pilote, baptisé « SMS for Life », sont présentés dans cet article.

## Méthodes

### Objectifs

L'étude pilote « SMS for Life » avait trois objectifs : (1) démontrer que la visibilité des niveaux de stock hebdomadaires des médicaments antipaludiques essentiels au niveau des établissements de santé favorise les mesures visant à éliminer et/ou réduire les ruptures de stock, (2) démontrer qu'une infrastructure de collecte de données ultramoderne peut être accessible via des outils simples tels que les SMS et les téléphones portables dans des lieux reculés de l'Afrique subsaharienne et (3) démontrer l'efficacité d'un modèle de partenariat public-privé.

### Lieu

Sur les 131 districts de Tanzanie, trois districts ruraux (Lindi Rural, Ulanga et Kigoma Rural) ont été sélectionnés par le PNLN pour participer à l'étude pilote, soit au total une population de 1,2 millions habitants. Les districts sélectionnés remplissaient les quatre critères d'inclusion. Premièrement, les districts devaient différer en termes de niveau de prestation de services de santé et d'accès à ces services, dans le but de fournir un échantillon largement représentatif de l'ensemble du pays. Lindi Rural est un district « moyen ». Ulanga est un district difficile en termes de pénuries de personnel, de niveau de compétence et d'isolement. Kigoma Rural pose également des problèmes, de par son importante taille géographique et la longue distance séparant l'entrepôt régional des établissements de santé éloignés. Deuxièmement, les districts devaient tous être situés dans des régions différentes du pays et être approvisionnés par des entrepôts régionaux différents. Troisièmement, dans tous les districts, le paludisme devait être une maladie endémique et la cause de décès la plus fréquente. Quatrièmement, les districts sélectionnés ne devaient pas participer à d'autres projets pilotes.

Les districts de Lindi Rural, Ulanga et Kigoma Rural comptaient respectivement 48, 30 et 51 établissements de santé, soit au total 129 établissements. Les districts de Lindi Rural et Kigoma Rural réalisaient leur approvisionnement en antipaludiques à l'aide d'un système « à flux tiré » via un SLI. Le district d'Ulanga entreprend actuellement une transition du système « à flux poussé » vers le système « à flux tiré ».

### Durée et étendue de l'étude pilote « SMS for Life »

L'étude pilote a duré 21 semaines. Cette durée a été choisie car elle couvrait deux cycles de commande trimestriels et cinq cycles de livraison mensuels. La collecte des données a débuté le 1er octobre 2009 et a pris fin le 25 février 2010.

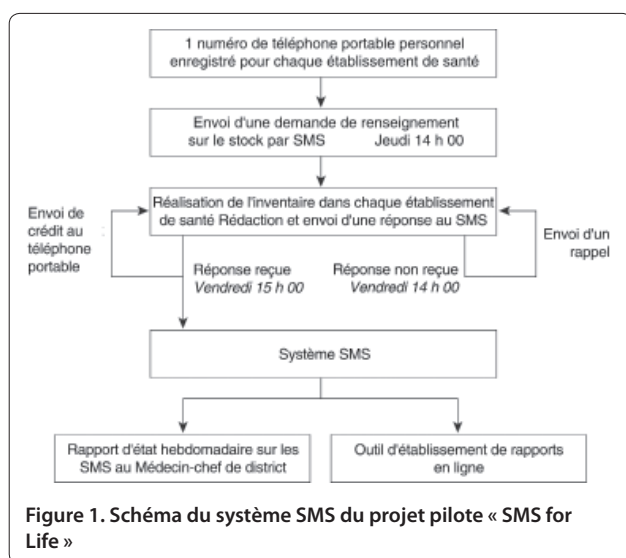

Le système a couvert les stocks d'artéméther-luméfantine (AL, Coartem®, Novartis Pharma AG, Bâle, Suisse) et de quinine injectable (fournie par plusieurs fabricants). Les stocks de quatre posologies différentes d'AL ont été inclus : les médicaments des boîtes « jaunes » ont été administrés aux nourrissons pesant entre 5 kg et moins de 15 kg, ceux des boîtes « bleues » aux enfants pesant entre 15 kg et moins de 25 kg, ceux des boîtes « rouges » aux enfants pesant entre 25 kg et moins de 35 kg et les médicaments des boîtes « vertes » aux enfants pesant 35 kg ou plus ainsi qu'aux adultes.

#### Le système « SMS for Life »

Le système se compose de deux éléments : un outil de gestion SMS et un outil d'établissement de rapports en ligne.

#### Outil de gestion SMS (figure 1)

L'application SMS enregistre un numéro de téléphone portable unique réservé à un professionnel de la santé dans chaque établissement de santé. Une fois par semaine, une demande de renseignement sur les stocks est envoyée par SMS à chacun de ces numéros de téléphone. Les messages de réponse sont envoyés à l'aide d'un code abrégé gratuit, sans frais pour le professionnel de la santé, c'est-à-dire que les téléphones n'ont pas besoin de crédit pour répondre. Un format de message standard est utilisé pour saisir les quantités de stock d'AL et de quinine et les erreurs de formatage sont gérées via l'envoi de SMS de suivi à l'établissement.

**Étape 1 :** un numéro de téléphone portable personnel réservé à un professionnel de la santé dans chaque établissement des trois districts participant à l'étude pilote a été obtenu lors de séances de formation et enregistré dans l'application SMS. Seuls les messages

relatifs aux stocks envoyés par les numéros de téléphone portable personnels enregistrés sont acceptés.

**Étape 2 :** tous les jeudis à 14 h 00, une demande de renseignement sur les stocks est envoyée par SMS à tous les professionnels de la santé des établissements enregistrés.

**Étape 3 :** l'ensemble du contenu des boîtes d'AL stockées dans la salle d'entreposage de chaque établissement est comptabilisé, et les flacons individuels de quinine injectable sont dénombrés dans la salle d'entreposage et la pharmacie (des méthodes de comptage différentes ont été établies à la demande du PNLP).

**Étape 4 :** un SMS est rédigé par le professionnel de la santé de l'établissement qui indique un code pour chaque type de médicament et la quantité, en suivant un format approuvé.

**Étape 5 :** le professionnel de la santé de l'établissement répond à la demande de renseignement sur le stock envoyée par SMS ou envoie un nouveau SMS à l'aide du code abrégé gratuit. Si le message est envoyé dans un format incorrect, le système en informe automatiquement l'expéditeur. Après trois tentatives infructueuses, la direction du district est avertie et on lui demande d'intervenir.

**Étape 6 :** le système SMS envoie un rappel automatique à tous les établissements de santé qui n'ont pas répondu avant vendredi 14 h 00.

**Étape 7 :** le système SMS crédite le téléphone portable du professionnel de la santé d'une somme d'argent fixée (1 000-1 500 TZS, en fonction du district) pour son usage personnel, si la réponse est reçue avant vendredi 17 h 00. Les réponses tardives sont acceptées jusqu'à 13 h 00 le jeudi suivant, mais aucun crédit n'est accordé aux téléphones portables.

**Étape 8 :** le système fournit un rapport d'état hebdomadaire au Médecin-chef de district (MCD) indiquant (a) les établissements de santé qui n'ont pas fourni d'inventaire et (b) ceux qui sont en rupture de stock.

#### Outil d'établissement de rapports en ligne

Les données recueillies à partir des SMS relatifs aux stocks sont publiées sur un site Web sécurisé dont l'accès nécessite un identifiant unique et un mot de passe. Un accès est accordé au MCD et à son personnel dans chaque district participant, les Médecins-chef régionaux concernés et leur personnel, l'équipe du projet, le PNLP et le Service des entrepôts médicaux, notamment les entrepôts régionaux affiliés à chaque district. Le site Web fournit a) des données actuelles et historiques sur les niveaux de stock d'AL et de quinine injectable au niveau des établissements de santé et des districts, (b) une cartographie Google des établissements de santé des districts indiquant les niveaux de stock et les alertes de rupture de stock, (c) des statistiques relatives aux SMS,

par ex., les erreurs, les messages reçus et (d) des statistiques d'utilisation.

#### **Gestion au niveau des districts**

Le MCD a nommé une personne du district pour redistribuer les médicaments afin de répondre aux ruptures de stock identifiées par le système « SMS for Life ». La redistribution pouvait être réalisée en téléphonant aux établissements de santé victimes de ruptures de stock pour les informer du stock excédentaire d'un établissement de santé voisin ou en contactant le point focal PNLP du district pour lui demander de transférer le stock excédentaire d'un établissement vers un établissement voisin.

#### **Formation des participants**

Une formation a été dispensée à trois niveaux :

(i) Au niveau national, une formation de base abordant le projet et le système a été dispensée lors d'une séance d'une demi-journée au PNLP, au service des entrepôts des médicaments et à d'autres employés afin de leur expliquer les objectifs du projet, l'utilisation du système d'établissement de rapports et les mesures à prendre en fonction des informations fournies sur les stocks.

(ii) Au niveau des districts, une séance de formation d'une demi-journée a été dispensée au MCD, au point focal du PNLP dans le district, au pharmacien du district et au représentant des entrepôts régionaux de chaque district. La formation a abordé l'utilisation du système d'établissement de rapports, les mesures à prendre en fonction des informations fournies sur les stocks, ainsi que l'éducation et le soutien apportés aux professionnels de la santé des établissements.

(iii) Au niveau des établissements de santé, une séance de formation d'une demi-journée a été dispensée en langue locale par le chef de projet national du PNLP aux professionnels de la santé des établissements de chaque district. La séance abordait l'enregistrement des numéros de téléphone portable personnels, la procédure d'inventaire et la rédaction de SMS relatifs aux stocks, et proposait des simulations en direct de l'inventaire, de la rédaction et de l'envoi de SMS, ainsi que de bonnes pratiques de gestion des stocks et d'entreposage des antipaludiques.

#### **Contrôle et évaluation**

Les rapports hebdomadaires sur les stocks, les statistiques de rupture de stock, les taux d'erreur, les livraisons et l'accès au système ont été contrôlés en ligne chaque jour, tout au long de l'étude pilote de 21 semaines. Des visites de surveillance ont été organisées au moins une fois dans 116 des 129 établissements de santé (90 %) pour valider l'exactitude des données relatives aux stocks fournies par les professionnels de la santé.

Les membres de l'équipe de direction des districts ont été interrogés vers la fin de l'étude pilote afin d'évaluer le mouvement des stocks au cours de l'étude, obtenir leurs impressions quant à l'utilisation du système de données et sa facilité d'accès et l'utilisation de la fonction d'enregistrement et de désenregistrement des numéros de téléphone portable des établissements de santé. On leur a également demandé leur avis sur la formation et les supports pédagogiques et leur point de vue sur le projet « SMS for Life » par rapport à d'autres pratiques de gestion des stocks et le potentiel de mise en œuvre du programme dans le futur. Tout au long du projet, des informations ont été recueillies sur chaque commande d'AL ou de quinine injectable passée auprès des entrepôts régionaux et chaque livraison de ces médicaments.

#### **Partenariat et contributions du projet**

Les partenaires du projet s'étaient engagés pour une durée déterminée de moins d'un an, sans budget centralisé, contrat formel ou protocole d'accord. Le Ministère tanzanien de la Santé et de la Protection sociale, le partenariat « Faire reculer le paludisme », Novartis Pharma AG, Vodafone et IBM ont participé au projet pilote. Chaque partenaire a financé ses propres activités.

Le PNLP de Tanzanie, agissant au nom du Ministère de la Santé et de la Protection sociale, était le propriétaire et l'utilisateur principal de l'étude pilote « SMS for Life » et a coordonné l'ensemble des activités du projet dans le pays, à savoir la planification, la mise en œuvre et l'évaluation, y compris la mise à disposition d'un chef de projet et de véhicules avec chauffeurs. Le partenariat « Faire reculer le paludisme » a assuré la surveillance du projet, y compris le travail du comité directeur et a mené des activités de sensibilisation. Novartis a mis en œuvre et mené l'étude pilote, en définissant la solution, en approvisionnant les partenaires, en établissant le comité directeur et en fournissant les ressources et le financement nécessaires (par ex., pour soutenir la formation des professionnels de la santé). Vodafone et son partenaire, Mtssoft, ont soutenu la conception, le financement et le développement de l'application du système et la mise en œuvre de la solution technique. Ils ont également financé tous les frais d'exploitation technique de l'étude pilote. IBM a apporté son soutien en fournissant des ressources de gestion au projet et un outil de collaboration en ligne, « Lotus Live », qui a permis à tous les partenaires du projet de coordonner leurs contributions grâce aux réseaux de l'entreprise.

#### **Résultats**

##### **Collecte de données**

Au cours de l'étude de 21 semaines, le taux de réponse moyen aux demandes de renseignement sur les stocks envoyées par SMS était de 95 %. Le taux de réponse n'est

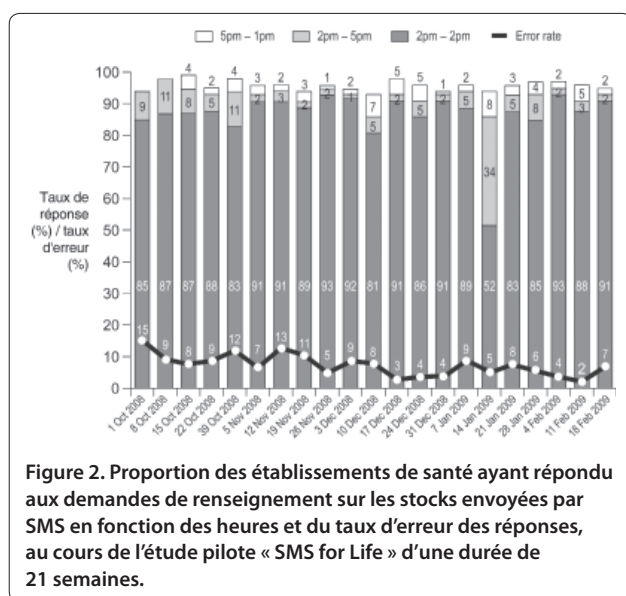

jamais descendu en dessous de 93 % (figure 2). La proportion de réponses tardives (c'est-à-dire après 17 h 00 le vendredi) était faible, à savoir 3 % en moyenne. Le taux de réponse et la proportion de réponses tardives n'ont pas sensiblement varié au cours de l'étude pilote, excepté après la réponse envoyée le 14 janvier 2010 lorsqu'un problème national de connectivité est survenu sur un réseau de téléphonie mobile (figure 2). Le taux de réponse le plus élevé a été enregistré dans le district de Lindi Rural (99 %), contre 93 % pour le district d'Ulanga et 94 % pour le district de Kigoma Rural. Ce résultat est probablement le fruit de mesures disciplinaires prises dans le district de Lindi Rural qui consistaient en l'envoi de lettres d'avertissement et en l'organisation d'entretiens dans le bureau du district avec les employés de l'établissement qui ne respectaient pas les règles de l'étude. Dans les trois districts, les remarques de la direction des districts et les données issues de questionnaires remplis par les professionnels de la santé des établissements indiquaient que le crédit financier accordé en cas de réponse dans le délai imparti contribuait en grande partie au taux de réponse élevé.

Le taux d'erreur de la rédaction des réponses SMS était faible, à savoir 7,5 % en moyenne, tout au long de l'étude (figure 2). Dans le district de Lindi Rural, 100 % des réponses posant problème ont été corrigées et, bien que les données concernant le taux de correction n'aient pas été régulièrement collectées, le fait que le taux de réponses acceptées ne soit jamais descendu en dessous des 93 % confirme que même les messages incorrects envoyés par les deux autres districts ont généralement été corrigés. D'après l'évaluation des visites de surveillance effectuées dans 116 des 129 établissements de santé des trois districts, l'inventaire a révélé un taux d'exactitude

des données de 94 %, c'est-à-dire que le message le plus récent envoyé au sujet du stock correspondait au stock inspecté dans l'établissement de santé.

### Utilisation du système

La connexion centrale du PNLN était activée en moyenne une fois par jour. Le service central des entrepôts médicaux et les entrepôts régionaux des trois districts n'ont pratiquement jamais accédé au système. Au niveau des districts, les courriers électroniques hebdomadaires envoyés par le système « SMS for Life » étaient lus par au moins un membre de l'équipe de direction de chaque district, chaque semaine au cours de l'étude pilote, à l'exception d'un seul courrier électronique adressé à l'équipe de Kigoma. Dans le district de Lindi Rural, l'utilisation du système a diminué au fur et à mesure que les ruptures de stock étaient éliminées après la 8ème semaine, passant de 45 connexions en octobre 2009 à 13 connexions en février 2010. Dans le district d'Ulanga, les connexions ont augmenté (35 connexions en octobre-décembre, contre 70 connexions pendant les 6 dernières semaines du projet) lorsque le médecin du cabinet médical du district a reçu un BlackBerry et des suggestions plus directives de la part de l'équipe du projet « SMS for Life ». Dans le troisième district, Kigoma Rural, l'accès au système était peu important au début (33 fois en octobre-décembre) mais est passé à 28 fois au cours des 6 dernières semaines lorsque le pharmacien du district et le point focal PNLN ont chacun reçu un BlackBerry pour pouvoir accéder aux données relatives aux stocks.

### Niveaux de stock des antipaludiques

Au début de l'étude pilote (1ère semaine), 78 % des établissements de santé ne possédaient aucun stock pour au moins une des quatre posologies différentes d'AL ou de quinine injectable. À la fin de l'étude (21ème semaine), cette proportion avait chuté à 26 %. La réduction des ruptures de stock était en grande partie liée aux améliorations des stocks d'AL, puisque la proportion d'établissements de santé en rupture de stock de quinine au début de l'étude était inférieure (18 % contre 77 % d'établissements en rupture de stock d'AL) (figure 3). Les ruptures de stock de toutes les posologies d'AL ont accusé une baisse progressive au cours des deux premiers mois de l'étude pilote, mais ont enregistré une hausse régulière de la mi-décembre à la deuxième moitié de janvier, à l'image du calendrier de livraison du SLI. À la fin de l'étude, les ruptures de stock de boîtes d'AL bleues, vertes et jaunes avaient presque été éliminées mais 20 % des établissements de santé ne disposaient toujours pas de boîtes rouges, pénurie causée en grande partie par les ruptures de stock incessantes du district de Kigoma Rural (figure 4a). Plus de 80 % des établissements détenaient

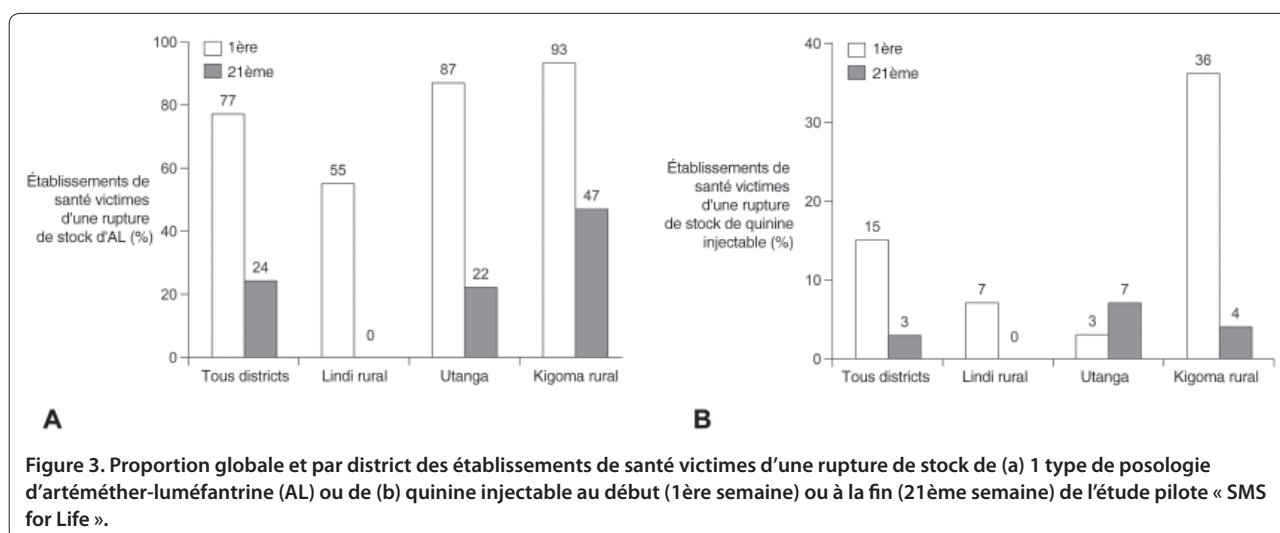

des stocks de quinine injectable au début de l'étude. Ce pourcentage est passé à 95 % à la fin de l'étude pilote (figure 4b).

Pendant la même période, le stock total d'AL dans les trois districts est passé de 2 696 boîtes (1ère semaine) à 4 411 boîtes (21ème semaine), soit une hausse de 64 %, tandis que le nombre d'ampoules de quinine est passé de 12 536 à 16 981 (36 %). Les niveaux de stock ont accusé une légère augmentation pour toutes les posologies d'AL la 21ème semaine, avec des niveaux similaires pour les boîtes d'AL bleues, vertes et jaunes, mais les niveaux de stock des boîtes rouges sont restés inférieurs à ceux des autres posologies, encore principalement du au district de Kigoma Rural (figure 5a). Les niveaux de stock de quinine injectable ont également enregistré une légère augmentation au cours de l'étude pilote (figure 5b).

On a constaté de nettes différences entre les trois districts en termes de constitution d'un stock complet et de niveaux de stock, pour diverses raisons. Le district de Lindi Rural est celui qui a le mieux réussi à gérer les niveaux de stock, en supprimant les ruptures de stock des cinq catégories de médicaments avant la 8ème semaine et en conservant, par la suite, les stocks des trois anti-paludiques dans la quasi-totalité des établissements de santé. Deux facteurs y ont contribué. Premièrement, après avoir reçu le premier ensemble de données relatives aux stocks, l'équipe de direction du district a passé commande en urgence auprès de l'entrepôt régional. Cette commande a été distribuée aux établissements de santé en fonction de l'urgence de leur demande, au cours des semaines 2, 3 et 4, supprimant ainsi la plupart des ruptures de stock. Deuxièmement, lorsqu'un établissement de santé signalait qu'il ne lui restait qu'une seule

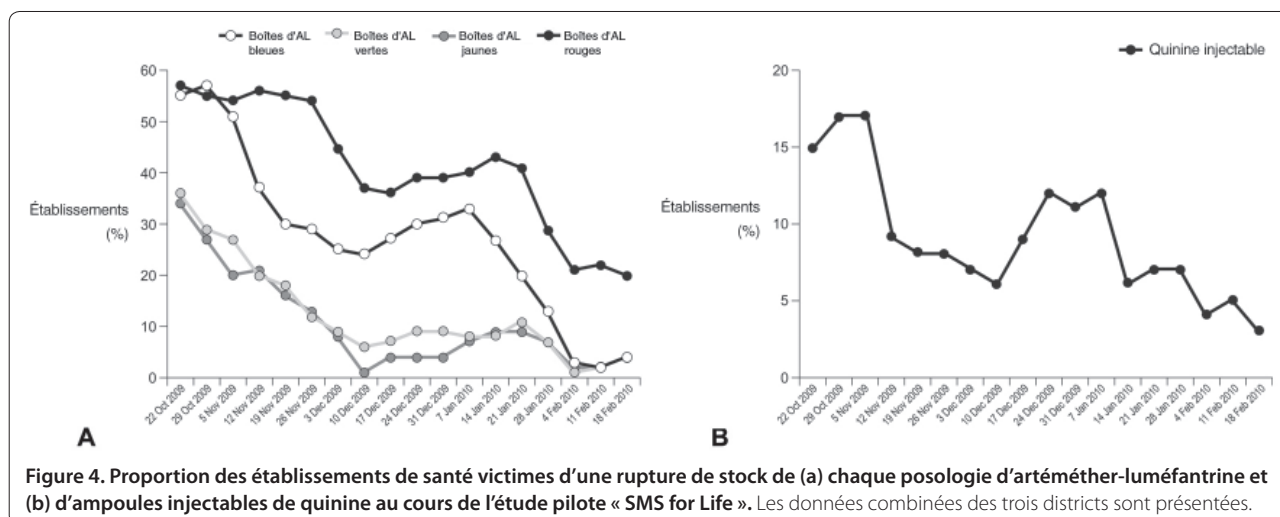

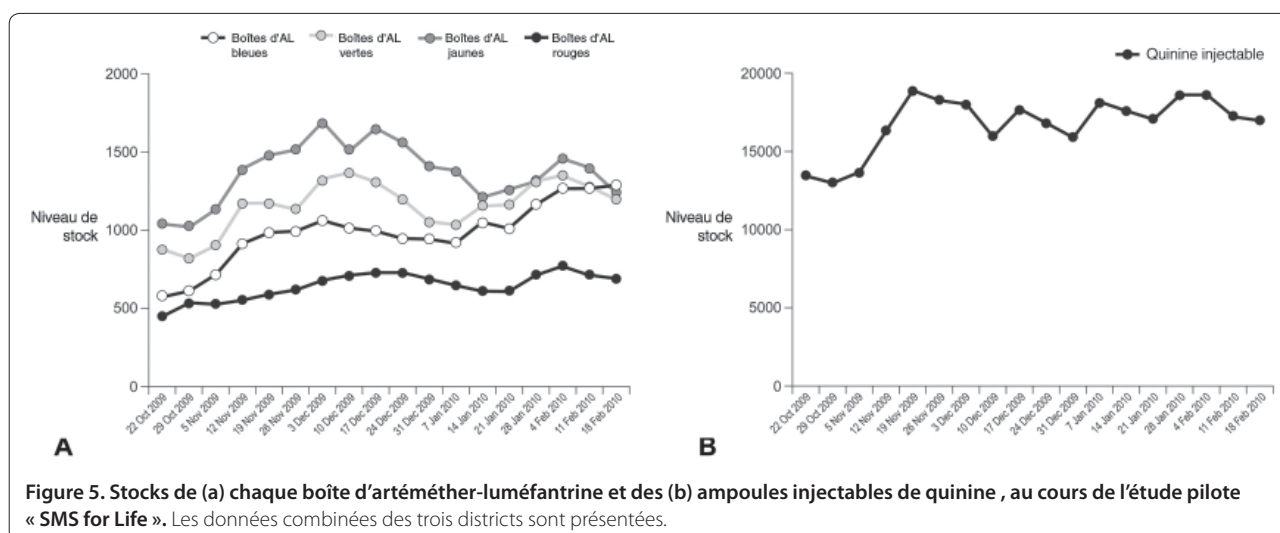

boîte de l'une des posologies d'AL, le pharmacien du district choisissait de lui fournir un stock supplémentaire ou bien de transférer une partie du stock d'un établissement voisin de manière préventive. Dans le district d'Ulanga, pendant la 1ère semaine, le taux de ruptures de stock était élevé (87 % des établissements), en grande partie parce qu'aucune boîte bleue d'AL n'avait été livrée au district depuis près d'un an. En outre, au cours de l'étude, le district d'Ulanga entreprenait une transition du système « à flux poussé » vers le SLI. Par conséquent, les livraisons étaient retardées et on constatait des différences entre les commandes et les livraisons de stocks de médicaments ; Par exemple, aucune boîte bleue d'AL n'était livrée et on ne recevait que de très petites quantités d'autres boîtes d'AL. De plus, les livraisons urgentes n'étaient pas reçues. Suite à deux livraisons réalisées à l'aide du SLI, dont la deuxième comprenait des boîtes bleues d'AL, 78 % des établissements de santé du district d'Ulanga disposaient d'un stock complet avant la 21ème semaine. Cependant, la proportion d'établissements ne possédant pas de quinine injectable est augmentée de 3 % la 1ère semaine à 7 % la 21ème semaine. Dans le troisième district, Kigoma Rural, presque tous les établissements de santé (93 %) étaient en rupture de stock d'au moins un type d'antipaludique la 1ère semaine, et 36 % étaient en rupture de stock des cinq produits. On a observé une pénurie constante de boîtes rouges d'AL jusqu'à la fin du mois de janvier 2010, et 42 % des établissements de santé ne disposant toujours pas de boîtes rouges à la fin de l'étude. Toutefois, plus de 90 % des établissements possédaient des stocks de tous les autres produits avant la 21ème semaine. Le district dépendait uniquement des livraisons régulières réalisées à l'aide du SLI. Après les deux livraisons reçues via le SLI au cours de l'étude pilote, la direction du district a mis 3-4 semaines pour distribuer les médicaments de la

première livraison à l'ensemble des établissements de santé ; Après la livraison d'une commande complète via le SLI à la fin décembre, comprenant des boîtes rouges d'AL, les stocks de boîtes rouges ont seulement augmenté à partir du 21 janvier. Plusieurs facteurs ont contribué aux résultats du district de Kigoma Rural. La quantité des livraisons de boîtes rouges d'AL réalisées via le SLI était seulement suffisante pour empêcher les ruptures de stock pendant trois semaines, si bien que les ruptures de stock étaient inévitables. Deuxièmement, lorsque les boîtes rouges ont été livrées, elles ont été distribuées de manière inégale entre les établissements, certains n'ayant reçu aucune boîte, et aucune redistribution active n'a été menée par la suite. Enfin, aucune commande urgente n'a été émise au district de Kigoma Rural, malgré de graves pénuries de médicaments pendant la majorité de l'étude pilote.

## Discussion

L'étude pilote « SMS for Life » a atteint ses trois objectifs. Premièrement, la visibilité des niveaux de stock d'antipaludiques au niveau des établissements de santé a soutenu une gestion plus efficace des stocks. Dans les trois districts, la proportion d'établissements de santé disposant de stocks complets pour les cinq antipaludiques est passée d'environ un quart à trois quarts pendant l'étude pilote de 21 semaines. Deuxièmement, le système « SMS for Life » a apporté des informations précises sur les niveaux de stock à toutes les parties prenantes à l'aide d'une technologie SMS simple et largement répandue, facilement accessible pour les utilisateurs appropriés. Troisièmement, le modèle de partenariat public-privé a extrêmement bien fonctionné et a fortement contribué à la réussite du projet.

Pour que les stocks des cinq antipaludiques soient complets, un niveau initial adéquat de médicaments était

nécessaire dans le district, tout comme une redistribution proactive des médicaments par la direction du district entre les établissements de santé. La redistribution risque toujours d'être nécessaire pour compenser la livraison de quantités variables à différents établissements de santé et les taux de consommation variés, en particulier en cas de rupture de stock. En mettant en évidence les niveaux de stock, le système « SMS for Life » a démontré que ces deux critères pouvaient être remplis, comme l'a démontré le district de Lindi Rural où les établissements de santé étaient pratiquement tous entièrement approvisionnés après la 8<sup>ème</sup> semaine de l'étude pilote. Des informations complètes ont été fournies sur les stocks par les établissements de santé, le taux de réponse moyen étant de 95 %. Les informations relatives au niveau de stocks étaient accessibles même dans les zones les plus reculées et étaient fournies au moyen de courriers électroniques hebdomadaires et de données en ligne, pour en faire le meilleur usage possible. Tous les aspects du système se sont révélés faciles à utiliser après seulement une brève séance de formation. Il était important de surveiller les connexions du personnel des districts et d'intervenir si nécessaire en offrant une formation supplémentaire ou d'autres solutions d'accès (par ex., la mise à disposition de BlackBerry ou de modems informatiques) ; ces interventions ont entraîné une hausse spectaculaire des taux de connexion dans les districts d'Ulanga et de Kigoma Rural. En suivant l'utilisation hebdomadaire de tous les médicaments antipaludiques (ACT, quinine et TDR, le cas échéant) par établissement de santé individuel, le système peut établir le profil des exigences annuelles de chaque établissement, pour fournir des informations et améliorer l'exactitude des commandes et l'efficacité de la chaîne d'approvisionnement. À partir de l'utilisation hebdomadaire de TDR et de ACT, le système peut aussi calculer un indicateur du nombre de tests positifs par rapport aux tests négatifs. Bien que les dates d'expiration ne soient pas surveillées, on a constaté que la visibilité hebdomadaire par établissement incitait les MCD à redoubler d'efforts dans le cadre de la mise en œuvre de la redistribution continue du stock entre les établissements, réduisant ainsi le risque de péremption du stock.

L'étude pilote a été mise en œuvre grâce à un nouveau partenariat public-privé, sous l'égide du partenariat « Faire reculer le paludisme ». La solution « SMS for Life » a été conçue, élaborée et mise en œuvre en moins d'un an, sans budget formel ni contrat juridique entre les partenaires. Avec un délai court et sans engagement financier, ce modèle était attirant pour les partenaires commerciaux potentiels, sans qui l'étude pilote n'aurait pas pu être menée.

Un certain nombre de facteurs de réussite décisifs ont été identifiés (tableau 1). L'engagement de haut niveau du

gouvernement est indispensable pour assurer l'exploitation, la durabilité du système et son utilisation obligatoire. La couverture de la téléphonie mobile dans une distance acceptable (au maximum à 2-3 heures de marche de l'établissement de santé, bien que l'idéal serait de 15 à 30 minutes) est une condition préalable nécessaire pour la participation. Il est également essentiel que les professionnels de la santé utilisent leurs téléphones portables personnels qu'ils connaissent bien et dont l'entretien ne fait pas partie des responsabilités du projet. Par conséquent, il est obligatoire qu'un numéro gratuit soit réservé à l'envoi d'informations relatives aux stocks afin que les messages puissent toujours être envoyés si le téléphone n'a plus de crédit, une situation qui survient fréquemment. Même si l'étude pilote n'incluait pas de groupe témoin sans incitation financière, les remarques des professionnels de la santé, la direction des districts et le PLNP indiquaient que l'octroi de crédit en cas de réponse ponctuelle jouait un rôle déterminant dans les taux de réponse importants observés. Les séances de formation destinées aux professionnels de la santé se sont révélées essentielles. L'étude pilote a démontré qu'il était important d'avertir préalablement les délégués de la nécessité de disposer d'un téléphone portable personnel, de dispenser une séance pratique sur l'envoi de SMS et d'élargir l'atelier en proposant des scénarios en direct.

D'autres utilisations des téléphones portables et des SMS visant à améliorer la prestation des soins de santé ont été précédemment examinées dans des environnements à ressources limitées en Afrique [7-10]. Celles-ci se concentraient essentiellement sur l'amélioration de l'observation thérapeutique chez les patients atteints de VIH / SIDA ou de tuberculose et sur la promotion de la communication entre les professionnels de la santé et les patients vivant dans des zones reculées [7-9]. Une étude pilote innovante menée en Zambie a utilisé des rapports SMS hebdomadaires faisant état de nouveaux cas de paludisme dans des centres de soins ruraux pour permettre la détection ponctuelle de diagnostics positifs et de faciliter ainsi une intervention opportune pour éviter une recrudescence de la transmission [10]. Ces approches se sont avérées réalisables d'un point de vue technique et ont obtenu de bons résultats, si bien qu'il semble probable que les systèmes basés sur la téléphonie mobile se développent dans le cadre de la prestation de soins dans les zones rurales d'Afrique. L'étude actuelle qui, à notre connaissance, est la première à mettre en pratique un système basé sur la technologie SMS pour gérer les niveaux de stock à un niveau local, a mis en évidence une autre application pratique et réussie de cette technologie. Lorsque le recours aux TDR s'accroîtra en Tanzanie, les niveaux de stock de ACT diminueront en conséquence et une gestion des stocks rigoureuse deviendra encore plus indispensable pour éviter les



**Tableau 1. Facteurs de réussite décisifs de la mise en œuvre du projet « SMS for Life »**

| Facteur                                                                                 | Commentaires                                                                                                                                                                                                                                                                                          |
|-----------------------------------------------------------------------------------------|-------------------------------------------------------------------------------------------------------------------------------------------------------------------------------------------------------------------------------------------------------------------------------------------------------|
| Inclusion dans les programmes traditionnels du gouvernement                             | S'assurer que le système est obligatoire et inclut dans la description du poste / des responsabilités du personnel du district.<br>Les activités du projet ne dépendent pas de ressources externes.                                                                                                   |
| Délai fixe                                                                              | Un délai de mise en œuvre spécifique est conseillé.<br>Une période de 12 à 18 mois est recommandée.<br>Des délais stricts et une gestion de projet solide sont essentiels.                                                                                                                            |
| Couverture de la téléphonie mobile                                                      | Une couverture de la téléphonie mobile est obligatoire dans une limite de 2 à 3 heures de l'établissement de santé pour la participation au projet.<br>La mise en œuvre future doit se concentrer sur les zones bénéficiant d'une couverture adéquate.                                                |
| Numéro de téléphone portable gratuit                                                    | Souvent, les téléphones personnels n'ont plus de crédit. Grâce à ce numéro gratuit, le coût n'a pas un effet dissuasif sur les professionnels de la santé qui peuvent répondre gratuitement aux demandes de stock.                                                                                    |
| Utilisation de téléphones portables personnels                                          | Évite les problèmes d'entretien, de familiarité et de propriété associés aux téléphones appartenant au projet.<br>L'enregistrement et le désenregistrement permettent de modifier les numéros de téléphone portables personnels et des employés de l'établissement.                                   |
| Crédit accordé aux réponses ponctuelles aux demandes de renseignement sur le stock      | Créditer légèrement les téléphones portables personnels pour chaque réponse envoyée en temps voulu (recommandé pendant au moins un an).                                                                                                                                                               |
| Accès des téléphones portables au système                                               | Fournir une version téléphone portable du système, ainsi que des BlackBerry ou des appareils similaires si nécessaire, pour permettre à l'équipe de direction de se connecter au système si l'accès informatique pose des problèmes.                                                                  |
| Séance de formation efficace destinée aux professionnels de la santé des établissements | Insister sur l'importance de disposer d'un téléphone portable personnel dont la couverture du réseau est connue dans la zone de l'établissement de santé.<br>Inclure une séance pratique sur les SMS.<br>Prolonger la séance pratique afin de pouvoir exécuter à deux reprises 5 scénarios en direct. |
| Amélioration des salles d'entreposage des établissements de santé                       | La bonne pratique des pharmacies pourrait être facilitée par une fourniture normalisée de matériel / rayonnage pour les salles d'entreposage.                                                                                                                                                         |
| Inclusion des inventaires des entrepôts régionaux                                       | Les inventaires hebdomadaires des entrepôts régionaux donneraient une visibilité totale sur les niveaux et la couverture des stocks de l'ensemble du pays.                                                                                                                                            |

ruptures de stock. Le système actuel deviendrait alors encore plus précieux et offrirait, en outre, une surveillance hebdomadaire des fournitures de TDR pour éviter le retour au diagnostic clinique pour lequel les stocks de ACT seraient alors inappropriés.

En conclusion, cette étude pilote innovante démontre que le système « SMS for Life » a le potentiel d'améliorer la disponibilité limitée des antipaludiques dans les zones rurales, l'un des obstacles majeurs à la gestion efficace de la maladie. Le système est flexible, évolutif et compatible avec tous les réseaux de téléphonie mobile. En outre, on peut mettre en œuvre ce système dans tous les pays en procédant à une adaptation minimale. Les coûts de la mise en œuvre du système à une plus grande échelle seraient abordables, environ 5 000 \$ par district en Tanzanie, l'élément le plus important étant la somme journalière versée aux employés des établissements de santé afin qu'ils puissent assister aux séances de formation. Après la mise en œuvre, les frais s'élèveraient environ à 7 000 \$ par district chaque année, les primes d'encouragement hebdomadaires comprises. Le système pourrait aussi être appliqué favorablement à la gestion des stocks d'autres médicaments prioritaires dans des

cadres similaires. Enfin, le modèle de partenariat public-privé testé dans le cadre de cette étude a efficacement exploité une série de compétences et d'expertises diverses et pourrait être utilisé pour aborder d'autres problèmes de société.

#### Abréviations

ACT : combinaison thérapeutique à base d'artémisinine ; AL : artéméther-luméfántrine ; MCD : Médecin-chef de district ; PNLN : Programme national de lutte contre le paludisme ; OMS : Organisation mondiale de la santé

#### Conflits d'intérêts

J. Barrington est un employé de Novartis Pharma. Olympia Wereko-Brobby était interne chez Novartis Pharma lors de sa contribution au projet. Les autres auteurs n'ont aucun conflit d'intérêt à déclarer.

#### Contributions des auteurs

En tant que directeur du programme, *Jim Barrington* a développé le concept initial du projet, établi l'équipe du projet, pris contact et travaillé en liaison avec tous les partenaires du projet, coordonné l'ensemble de l'activité et préparé le rapport du projet sur lequel se base l'article.

*Olympia Wereko-Brobby* a apporté un soutien organisationnel tout au long du projet au directeur du programme et a participé à l'élaboration du rapport du projet.

*Peter Ward* a été chef de projet pendant la totalité de l'étude. En outre, il a considérablement peaufiné la version finale des rapports du projet et réécrit le document d'orientation.

*Winfred Mwafongo* s'est occupé de l'organisation locale des visites dans les établissements de santé et des séances de formation, et a dirigé la formation

réservée au personnel des établissements de santé du projet.

En tant que Médecin-chef du district de Lindi Rural, *Seif Kungulwe* a participé aux séances de formation destinées au personnel des établissements de santé et a apporté sa contribution active à tous les aspects de la mise en œuvre du projet.

#### Remerciements

L'étude pilote « SMS for Life » n'aurait pas été possible sans les contributions inestimables de l'expertise et des ressources du Ministère tanzanien de la Santé et de la Protection sociale, le partenariat « Faire reculer le paludisme », Novartis Pharma AG, Vodafone / Matssoft et IBM. L'étude pilote a également reçu le généreux soutien de Ka-Ping-Yee (élaboration de cartes Google), de British Airways (fourniture de vols subventionnés), de Splainers (création d'une vidéo de projet), de Mathias Leemann (photographe des supports pédagogiques) et de Google pour la concession d'une licence gratuite Google API. Les auteurs souhaiteraient également remercier les membres du Comité directeur de « SMS For Life » : le Professeur Awa Marie Coll-Seck, Directrice exécutive du partenariat « Faire reculer le paludisme » (Présidente) ; le Dr. Alex Mwitwa, Directeur du PNLP en Tanzanie ; le Dr. Desmond Chavasse, Directeur du Plan d'action mondial contre le paludisme ; le Professeur Marcel Tanner, Directeur de l'Institut tropical et de santé publique suisse ; le Professeur Klaus Leisinger, PDG de la Fondation Novartis pour le développement durable et Silvio Gabriel, Vice-président exécutif de Novartis Malaria Initiatives. Les auteurs souhaiteraient également exprimer leurs remerciements à tous les membres des équipes de Novartis, Vodafone et IBM qui ont consacré leur temps et leur expertise à ce projet, et sans qui tout cela n'aurait pas été possible. Enfin, nous souhaitons exprimer nos plus sincères remerciements à tous les MCD, les pharmaciens de district, les points focaux PNLP des districts et les membres du staff des 129 établissements de santé des trois districts qui ont participé à l'étude pilote « SMS for Life ». Cet article est publié dans le cadre de la série thématique du Malaria Journal intitulée « National Malaria Control Programme (NMCP) Best Practice Sharing Series » (Partage des bonnes pratiques du Programme national de lutte contre le paludisme - PNLP). Les frais de publication ont été financés par Novartis.

#### Sources de financement

Les activités de l'ensemble des partenaires ont été autofinancées. Un rédacteur médical a participé à la préparation de l'article, financé par Novartis Pharma.

#### Coordonnées des auteurs

<sup>1</sup>Directeur du programme « SMS for Life », Forum 1.P-94, Novartis Campus, CH-4056 Bâle, Suisse. <sup>2</sup>Service d'appui aux projets, Forum 1.P-94, Novartis Campus, CH-4056 Bâle, Suisse. <sup>3</sup>IBM (UK) Ltd, MP9, PO Box 31, Birmingham Rd, Warwick, CV34 5JL, Royaume-Uni. <sup>4</sup>Directeur des services de santé, Programme national de lutte contre le paludisme, Ministère de la Santé et de la Protection sociale, Ocean Road - NIMR Offices, Box 9083, Dar-es-Salaam, Tanzanie. <sup>5</sup>Médecin-chef de district, Conseil régional de Lindi, P.O. Box 328, Lindi, Tanzanie.

Reçu le 16 août 2010 - Accepté le 27 octobre 2010.

Publié le 27 octobre 2010.

#### Références

1. Directives sur le traitement du paludisme de l'OMS Organisation mondiale de la santé, Second [http://www.who.int/malaria/publications/atoz/9789241547925/en/index.html], consulté le 11 mai 2010.
2. Sinclair D, Zani B, Donegan S, Olliaro P, Garner P: **Artemisinin-based combination therapy for treating uncomplicated malaria.** *Cochrane Database Syst 2009, Rev 8*:CD007483.
3. Adjuik M, Babiker A, Garner P, Olliaro P, Taylor W, White N, International Artemisinin Study Group: **Artesunate combinations for treatment of malaria: meta-analysis.** *Lancet* 2004, **363**:9-17.
4. Targett G, Drakeley C, Jawara M, von Seidlein L, Coleman R, Deen J, Pinder M, Doherty T, Sutherland C, Walraven G, Milligan P: **Artesunate reduces but does not prevent posttreatment transmission of Plasmodium falciparum to Anopheles gambiae.** *J Infect Dis* 2001, **183**:1254-1259.
5. Price RN, Nosten F, Luxemburger C, ter Kuile FO, Paiphun L, Chongsuphajaisiddhi T, White NJ: **Effects of artemisinin derivatives on malaria transmissibility.** *Lancet* 1996, **347**:1654-1658.
6. OMS : **Rapport 2009 sur le paludisme.** [http://whqlibdoc.who.int/publications/2009/9789241563901\_eng.pdf], consulté le 21 mai 2010.
7. Mukund Bahadur KC, Murray PJ : **Cell Phone Short Messaging Service (SMS) for HIV/AIDS in South Africa: A literature review.** *Stud Health Technol Inform* 2010, **160**:530-534.
8. Hoffman JA, Cunningham JR, Suleh AJ, Sundsmo A, Dekker D, Vago F, Munly K, Igonya EK, Hunt-Glassman J: **Mobile direct observation treatment for tuberculosis patients: a technical feasibility pilot using mobile phones in Nairobi, Kenya.** *Am J Prev Med* 2010, **39**:78-80.
9. Lester RT, Mills EJ, Kariri A, Ritvo P, Chung M, Jack W, Habyarimana J, Karanja S, Barasa S, Nguti R, Estambale B, Ngugi E, Ball TB, Thabane L, Kimani J, Gelmon L, Ackers M, Plummer FA: **The HAART cell phone adherence trial (WeTel Kenya1): a randomized controlled trial protocol.** *Trials* 2009, **10**:87.
10. Kamanga A, Moono P, Stresman G, Mharakurwa S, Shiff C: **Rural health centres, communities and malaria case detection in Zambia using mobile telephones: a means to detect potential reservoirs of infection in unstable transmission conditions.** *Malar J* 2010, **9**:96.

doi:10.1186/1475-2875-9-298

**Cet article est une traduction de l'anglais, publié comme Additional file 1 de l'original, et doit être cité comme suit :** Barrington *et al.* : SMS for Life: a pilot project to improve anti-malarial drug supply management in rural Tanzania using standard technology. *Malaria Journal* 2010 **9**:298.
